# Supplementary material for: Solid-state NMR characterization of the structure and thermal stability of hybrid organic–inorganic compounds based on a HLaNb2O7 Dion–Jacobson layered perovskite
Source: Royal Society of Chemistry journal article supplement (doi:10.1039/c6cp02943d), 2016-01-01
Supplement: c6cp02943d1.pdf [file c6cp02943d1.pdf]

# Solid-State NMR Characterization of Structure and Thermal Stability of Hybrid Organic-Inorganic Compounds based on HLaNb<sub>2</sub>O<sub>7</sub> Dion-Jacobson Layered Perovskite

## Supporting Information

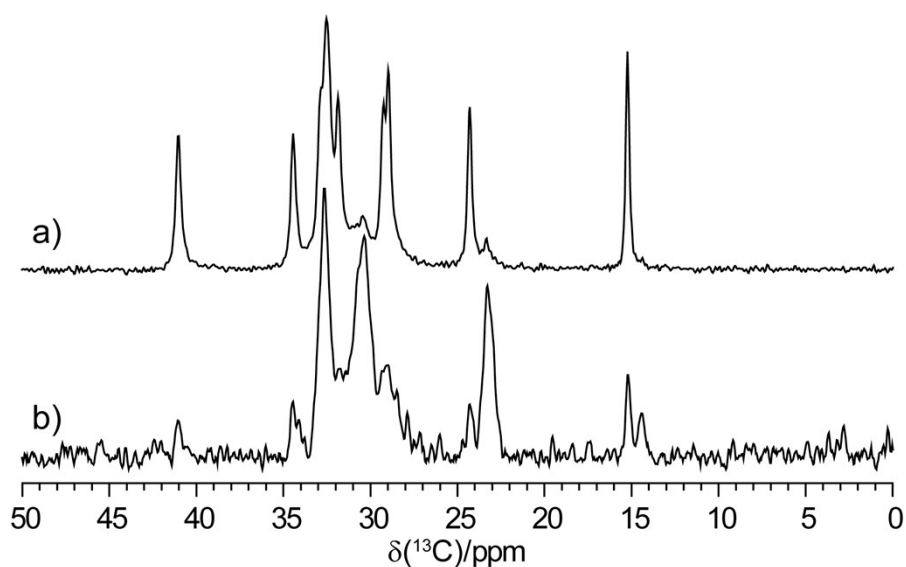

**Fig. S1** Comparison between the <sup>13</sup>C(1H) CP-MAS spectrum recorded with a contact time of 2.5 ms for the C10A sample (a), and the <sup>13</sup>C calculated projection obtained from the <sup>13</sup>C(1H) HETCOR experiment (b), which was recorded with the same contact time and is reported in Figure 5.

|                  | H <sup>+</sup><br>10.2 ppm | H <sup>+</sup> (water)<br>8.7 ppm | H <sup>+</sup> (NH <sub>3</sub> <sup>+</sup> )<br>8.4 ppm | H <sup>+</sup> (defect)<br>7.0 ppm |
|------------------|----------------------------|-----------------------------------|-----------------------------------------------------------|------------------------------------|
| HLN              | 72%                        | 26%                               | -                                                         | 2%                                 |
| HLN_TT           | 98%                        | -                                 | -                                                         | 2%                                 |
| 0.05-C8A         | 22%                        | 55%                               | 17%                                                       | 6%                                 |
| 0.05-C8A_TT110°C | 79%                        | -                                 | 16%                                                       | 5%                                 |
| 0.05-C8A_TT130°C | 79%                        | -                                 | 15%                                                       | 6%                                 |
| 0.05-C8A_TT150°C | 71%                        | -                                 | 15%                                                       | 14%                                |
| 0.05-C8A_TT170°C | 79%                        | -                                 | 12%                                                       | 9%                                 |
| 0.05-C8A_TT175°C | 81%                        | -                                 | 3%                                                        | 16%                                |
| 0.05-C8A_TT190°C | 80%                        | -                                 | -                                                         | 20%                                |
| 0.05-C8A_TT220°C | 88%                        | -                                 | -                                                         | 12%                                |
| 0.1-C8A          | 33%                        | 31%                               | 28%                                                       | 8%                                 |
| 0.1-C8A_TT110°C  | 65%                        | -                                 | 28%                                                       | 7%                                 |
| 0.1-C8A_TT130°C  | 69%                        | -                                 | 22%                                                       | 9%                                 |
| 0.1-C8A_TT150°C  | 67%                        | -                                 | 18%                                                       | 15%                                |
| 0.1-C8A_TT170°C  | 74%                        | -                                 | 6%                                                        | 20%                                |
| 1-C8A            | 35%                        | -                                 | 59%                                                       | 6%                                 |
| 1-C8A_TT110°C    | 52%                        | -                                 | 41%                                                       | 7%                                 |
| 1-C8A_TT130°C    | 54%                        | -                                 | 30%                                                       | 16%                                |
| 1-C8A_TT150°C    | 44%                        | -                                 | 5%                                                        | 51%                                |
| C8A              | 34%                        | -                                 | 41%                                                       | 25%                                |
| C8A_TT110°C      | 43%                        | -                                 | 28%                                                       | 29%                                |
| C8A_TT130°C      | 42%                        | -                                 | 16%                                                       | 42%                                |
| C8A_TT150°C      | 42%                        | -                                 | 6%                                                        | 52%                                |
| C8A_TT170°C      | 40%                        | -                                 | 5%                                                        | 55%                                |
| C10A             | 9%                         | -                                 | 60%                                                       | 31%                                |
| C10A_TT110°C     | 26%                        | -                                 | 27%                                                       | 47%                                |
| C10A_TT130°C     | 18%                        | -                                 | 20%                                                       | 62%                                |
| C10A_TT150°C     | 22%                        | -                                 | -                                                         | 78%                                |
| C3               | 25%                        | 46%                               | -                                                         | 29%                                |
| C3_TT110°C       | 51%                        | 22%                               | -                                                         | 27%                                |
| C3_TT150°C       | 54%                        | 28%                               | -                                                         | 18%                                |
| C3_TT170°C       | 48%                        | 31%                               | -                                                         | 19%                                |
| C3_TT190°C       | 49%                        | 34%                               | -                                                         | 17%                                |

**Table S1** Quantification of i) the amount of the single species of un-exchanged proton ions of the pristine HLN structure ( $\pm 2\%$ ), and ii) the molar ratio  $H^+ / NH_3^+$ . Data were obtained through simulation of quantitative  $^1H$  MAS NMR spectra.

| as prepared                            | $T_1$ /ms |          |        |        |
|----------------------------------------|-----------|----------|--------|--------|
|                                        | 0.05-C8A  | 0.01-C8A | 1-C8A  | C8A    |
| <b><math>^1\text{H}</math> site</b>    |           |          |        |        |
| $\text{CH}_3^-$                        | 352±8     | 331±8    | 342±7  | 354±6  |
| $-(\text{CH}_2)_5^-$                   | 323±7     | 338±8    | 322±5  | 358±6  |
| $\text{CH}_2\text{CH}_2\text{NH}^{3+}$ | 190±7     | 213±8    | 300±5  | 342±6  |
| $\text{CH}_2\text{NH}^{3+}$            | 234±8     | 250±6    | 304±5  | 390±30 |
| $\text{NH}^{3+}$                       | 71±6      | 80±7     | 220±10 | 280±10 |
| $\text{H}_2\text{O}$                   | 88±6      | 131±8    | 200±10 | 240±10 |
| $\text{H}^+$ HLN 7 ppm                 | 72±6      | 101±7    | 204±8  | 240±9  |
| $\text{H}^+$ HLN 8.2 ppm               | 122±8     | 148±8    | 249±9  | 299±8  |
| $\text{H}^+$ HLN 8.7 ppm               | 54±5      | 62±6     | -      | -      |
| $\text{H}^+$ HLN 10 ppm                | 170±10    | 201±8    | 235±7  | 280±20 |

  

| 110°C                                  | $T_1$ /ms |          |        |        |
|----------------------------------------|-----------|----------|--------|--------|
|                                        | 0.05-C8A  | 0.01-C8A | 1-C8A  | C8A    |
| <b><math>^1\text{H}</math> site</b>    |           |          |        |        |
| $\text{CH}_3^-$                        | 319±3     | 307±7    | 383±6  | 378±5  |
| $-(\text{CH}_2)_5^-$                   | 338±5     | 312±6    | 384±5  | 376±4  |
| $\text{CH}_2\text{CH}_2\text{NH}^{3+}$ | 320±10    | 259±6    | 294±3  | 296±6  |
| $\text{CH}_2\text{NH}^{3+}$            | 318±4     | 279±2    | 346±4  | 353±4  |
| $\text{NH}^{3+}$                       | 189±6     | 140±10   | 218±4  | 206±6  |
| $\text{H}^+$ HLN 7 ppm                 | 228±8     | 218±4    | 334±3  | 393±4  |
| $\text{H}^+$ HLN 8.2 ppm               | 248±3     | 218±1    | 306±3  | 328±8  |
| $\text{H}^+$ HLN 10 ppm                | 558±2     | 469±7    | 429±10 | 370±11 |

**Table S2** Quantification of  $^1\text{H}$   $T_1$  relaxation times for the several proton species of the C8A samples (as prepared and after the thermal treatment at 110°C).

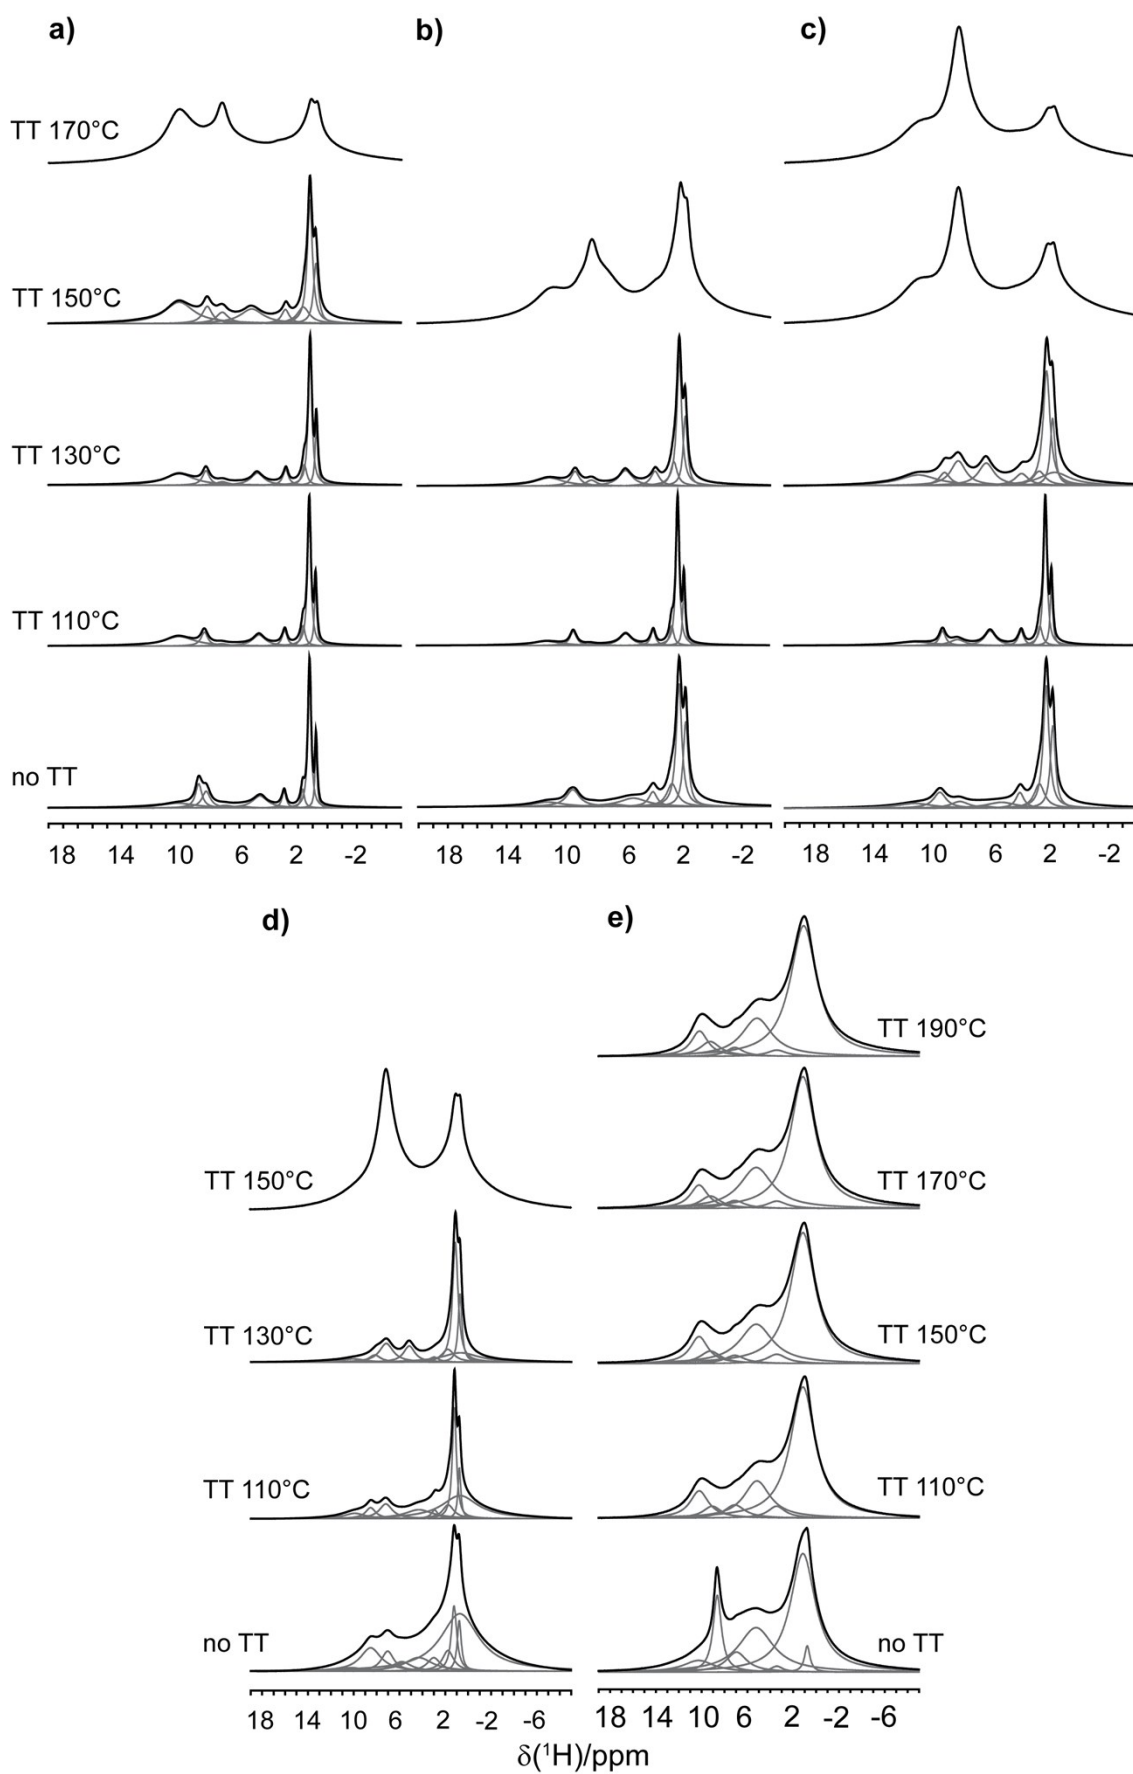

**Fig. S2**  $^1\text{H}$  MAS NMR spectra recorded after the different thermal treatments for 0.1-C8A (a), 1-C8A (b), C8A (c), C10A (d) and C3 (e). The gray lines are guides to follow the evolution of the different proton ions species.

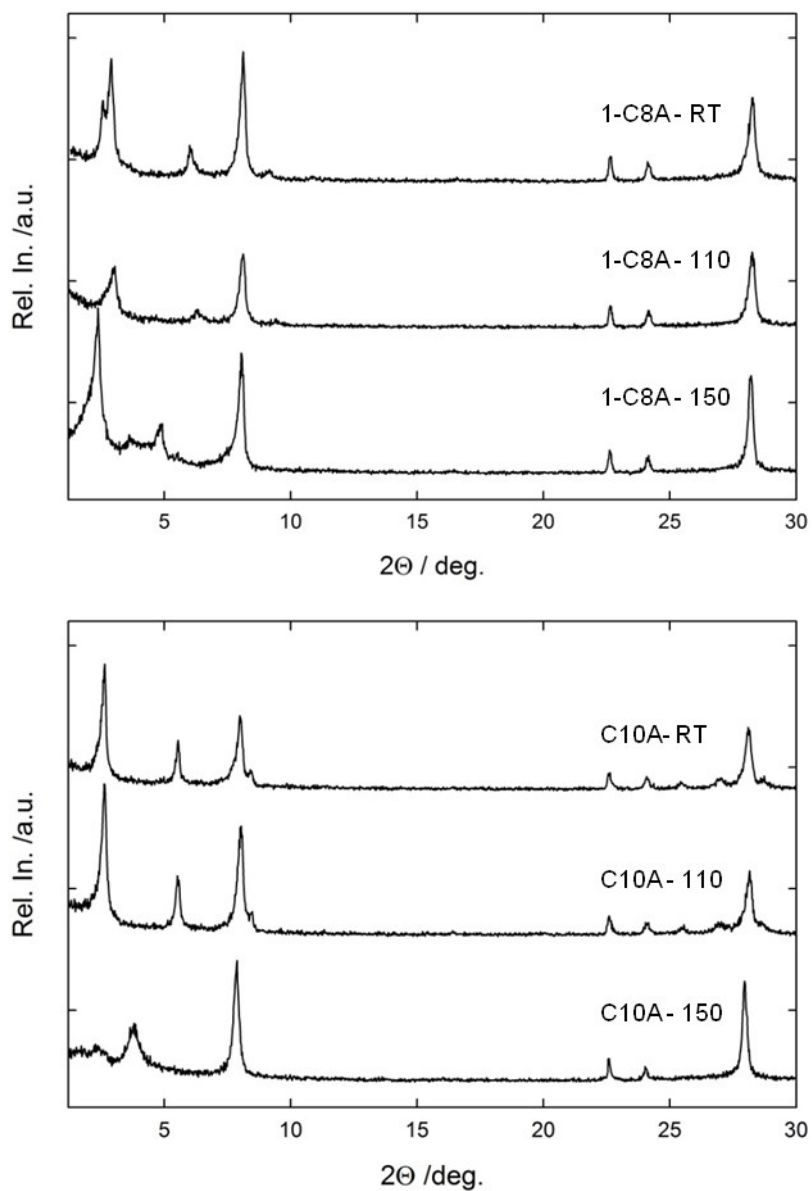

**Fig. S3** X-ray diffraction patterns acquired for the octylammonium-HLN samples 1-C8A and C10A as-received, after the 110°C step and after the 150°C step.

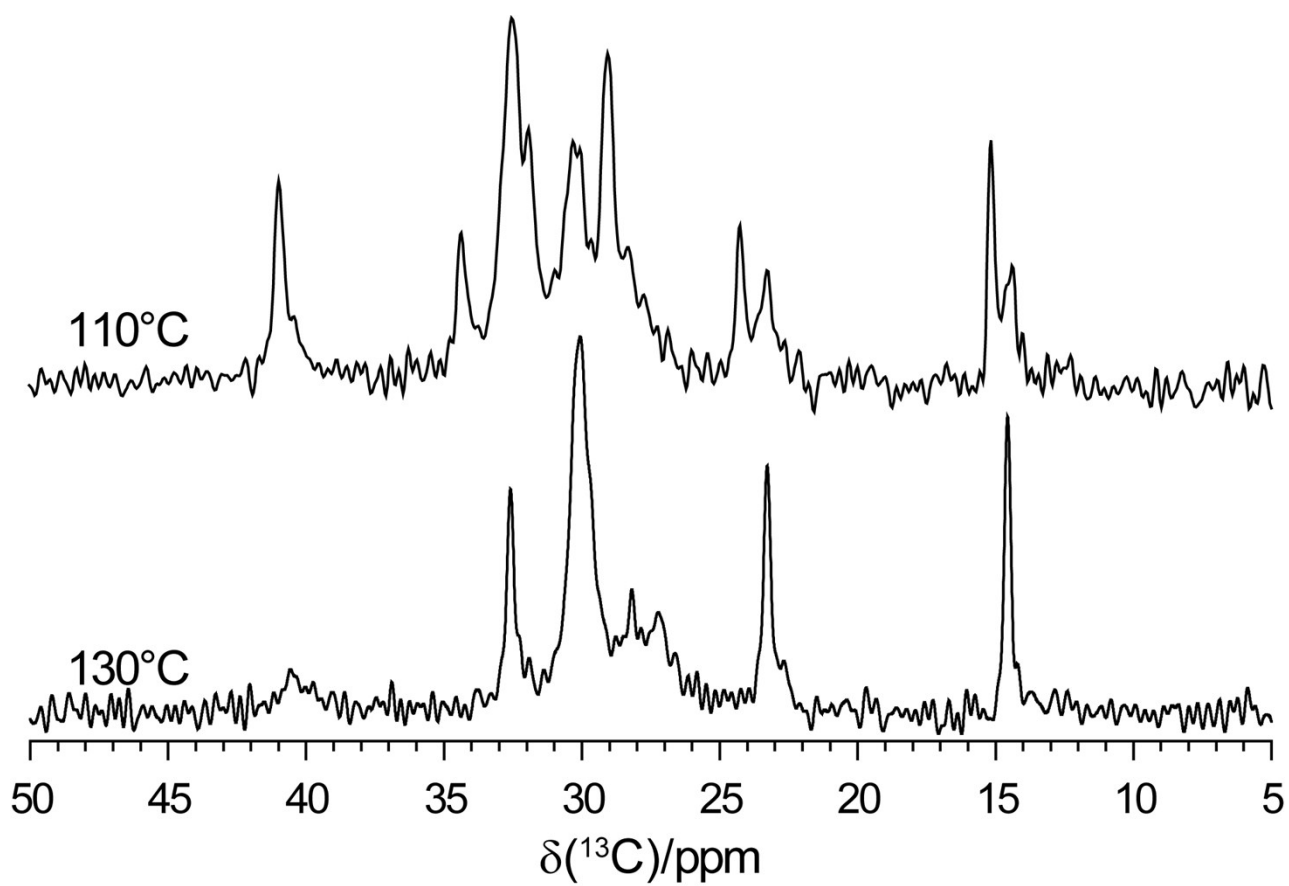

**Fig. S4**  $^{13}\text{C}(^1\text{H})$  DD one pulse MAS spectra recorded with a recycle delay of 4 s for C10A treated at  $110^\circ\text{C}$  and at  $130^\circ\text{C}$ .
